# Supplementary material
Source: HighWire-hosted journal article supplement (https://bmjopen.bmj.com/content/7/2/e013342)
Supplement: inline-supplementary-material-1 [file inline-supplementary-material-1.pdf]

## Toestemmingsformulier (informed consent)

Titel van het onderzoek: “*De juiste enkelvoetorthese voor optimale loopvaardigheid bij neuromusculaire aandoeningen*”

(1) Ik heb de informatiebrief voor de proefpersoon gelezen. Ik kon aanvullende vragen stellen. Mijn vragen zijn genoeg beantwoord. Ik had genoeg tijd om te beslissen of ik meedoe.

(2) Ik weet dat meedoen helemaal vrijwillig is. Ik weet dat ik op ieder moment kan beslissen om toch niet mee te doen. Daarvoor hoef ik geen reden te geven.

(3) Ik begrijp dat al mijn persoonlijke gegevens strikt vertrouwelijk worden behandeld en anoniem worden verwerkt. Slechts de onderzoekers en hun medewerkers aan het onderzoek hebben kennis van mijn identiteit.

(4) Ik geef toestemming dat bevoegde medewerkers van de Inspectie voor de Gezondheidszorg, leden van de medisch-ethische toetsingscommissie en auditoren en monitoren inzage kunnen krijgen in mijn medische gegevens en onderzoeksgegevens.

(5) Ik geef toestemming om de gegevens te verwerken voor de doeleinden zoals beschreven in de informatiebrief.

(6) Ik geef toestemming om gegevens nog maximaal 15 jaar na afloop van dit onderzoek te bewaren.

(7) Ik wil wel/niet\* benaderd worden voor vervolg onderzoek.

(8) Ik vind het goed om aan dit onderzoek mee te doen.

*\* doorhalen wat niet van toepassing is*

Naam deelnemer: .....

Handtekening: .....

Plaats: ..... Datum: \_\_ / \_\_ / \_\_ Tijd:.....

---

Ik heb mondelinge en schriftelijke toelichting verstrekt op het onderzoek. Ik verklaar mij bereid nog opkomende vragen over het onderzoek naar vermogen te beantwoorden. Een eventuele voortijdige beëindiging van deelname aan dit onderzoek zal niet van invloed zijn op de behandeling.

Naam onderzoeker : .....

Handtekening: .....

Plaats: ..... Datum: \_\_ / \_\_ / \_\_ Tijd:.....
